# Supplementary material
Source: PubMed Central journal article supplement (PMC6238062)
Supplement: zam023188856s1.pdf [file zam023188856s1.pdf]

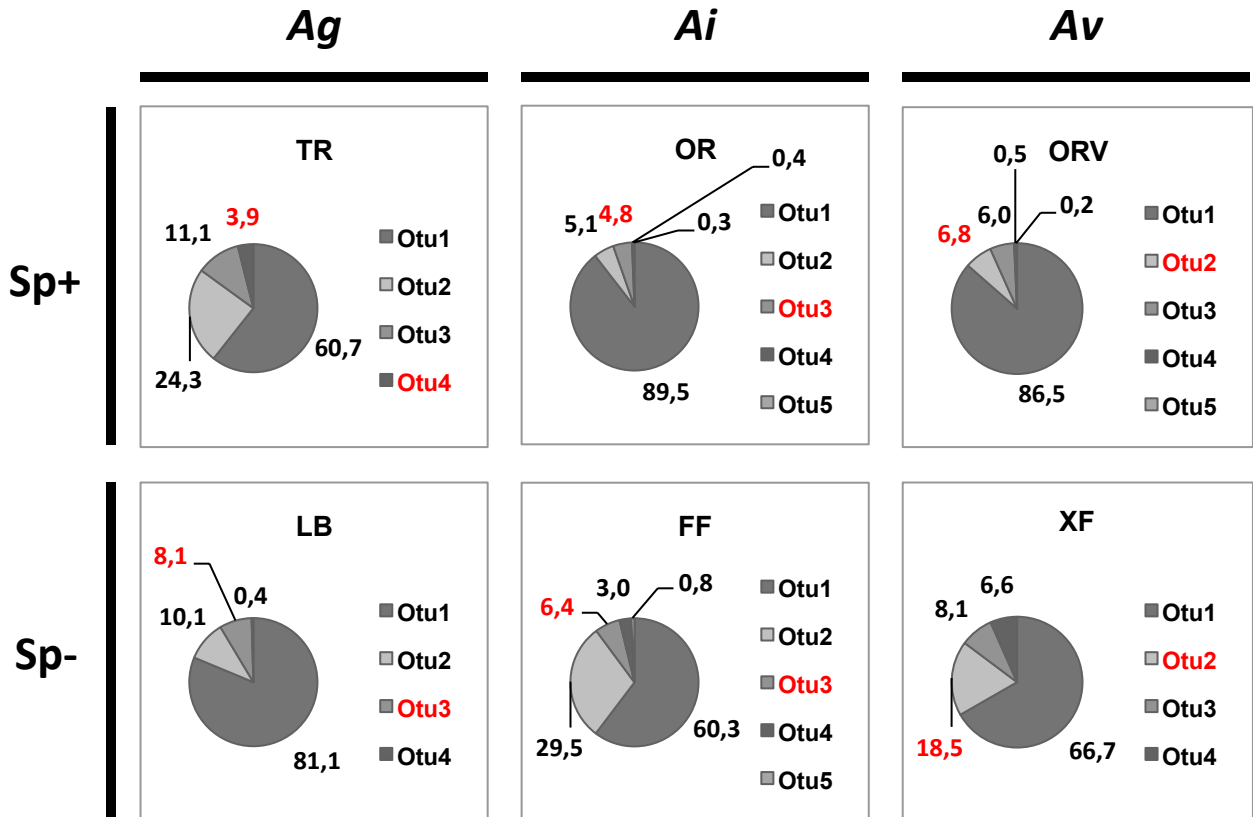

**Supplementary data S1. *Frankia* OTUs composition of soils based on *nifH* metabarcoding approach.** In red : most represented OTU of *Frankia* in plant trapped nodules

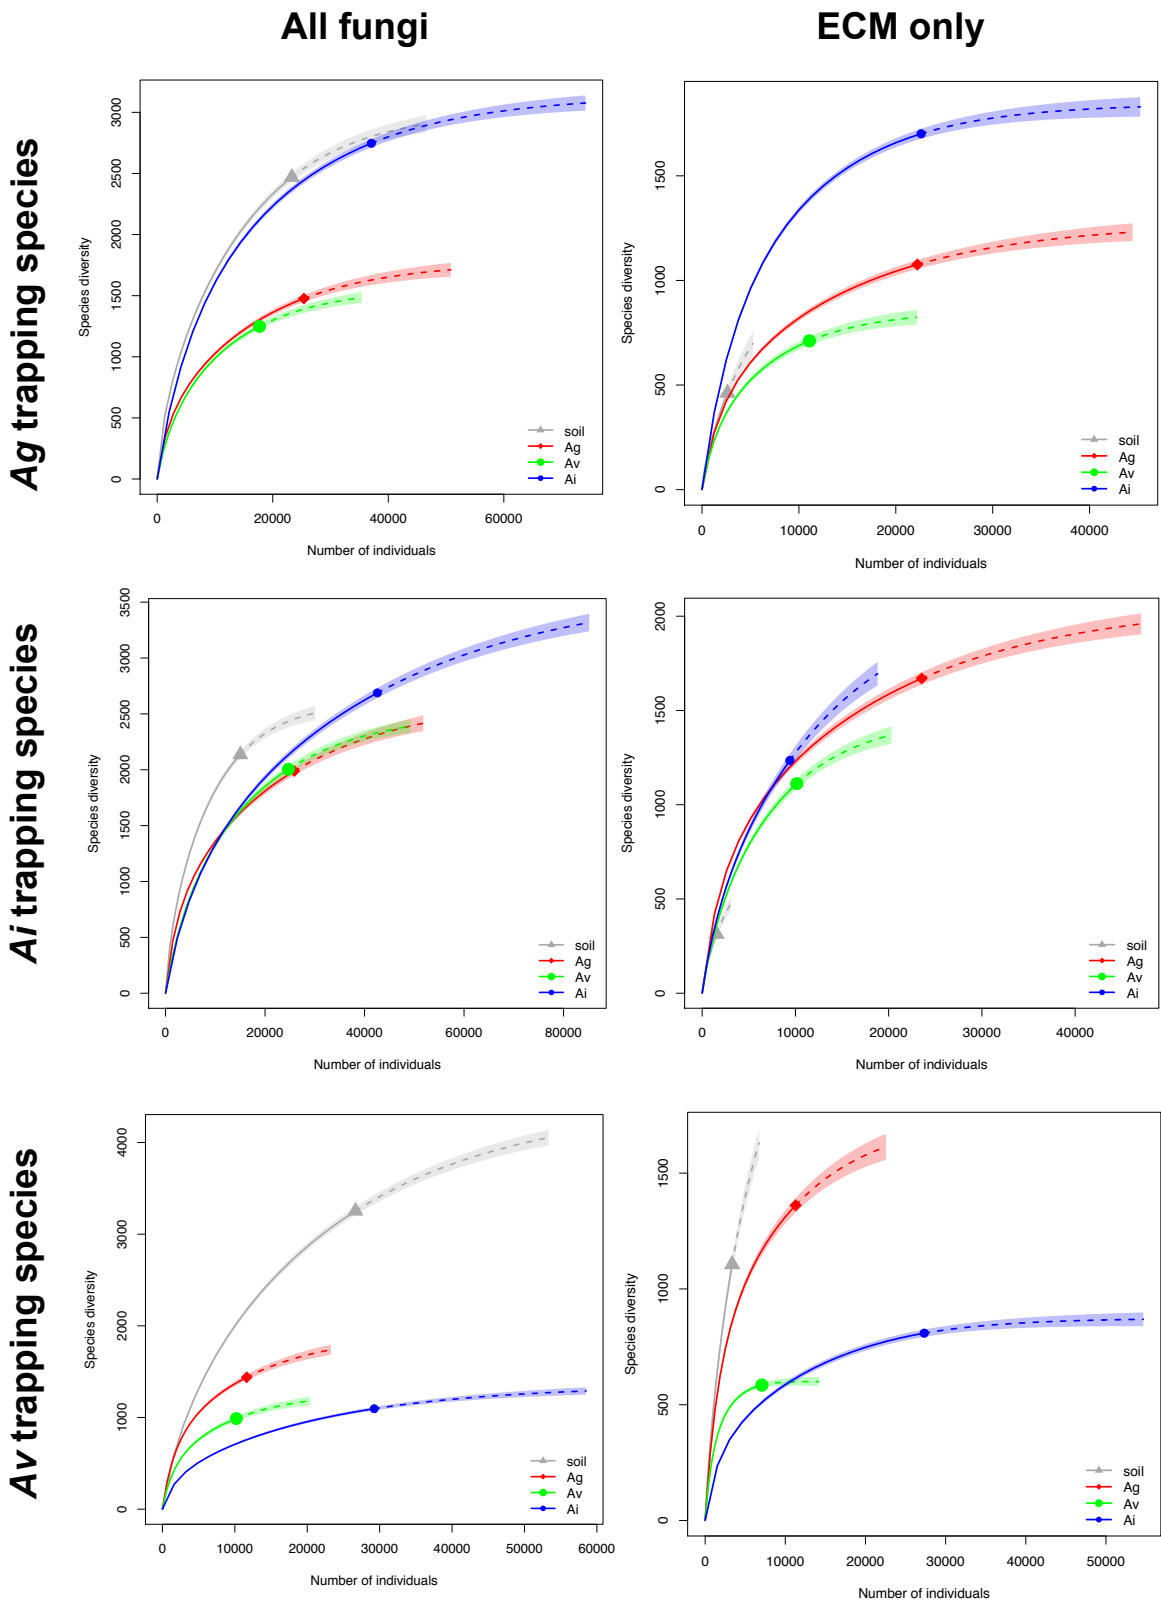

**Supplementary data S3.** Accumulation curves of fungal (left) and ECM (right) species richness measured on trapping plantlets (colored curves) on soils of *Ag* (red), *Ai* (blue) and *Av* (green) hosts, and compared to soil community (in grey), with extrapolation calculated from Hill numbers of richness ( $q=0$ ). Each graph illustrates for a trapping host-species, the difference between the accumulation curves on its own soil or on other soils.

**Supplementary data S2.** ITS1 sequences assignment to ECM families.

| Family                                  | number of OTUs | Ag soil | Ai soil | Av soil | Ag root | Ai root | Av root | Specificity toward <i>Alnus</i> sub. |
|-----------------------------------------|----------------|---------|---------|---------|---------|---------|---------|--------------------------------------|
| Not_assigned_to_ecm                     | 2003           | 20552   | 13260   | 23194   | 76489   | 89780   | 49194   | Not investigated                     |
| <i>Alnicola badia/umbrina</i>           | 1              | 490     | 285     | 590     | 5864    | 1390    | 17      | Cannot assess host specificity       |
| <i>Thelephoraceae</i> sp.               | 65             | 1013    | 590     | 1526    | 2081    | 1945    | 1176    | Not specific                         |
| <i>Alnicola luteolofibrillosa</i>       | 1              | 362     | 150     | 75      | 5480    | 1549    | 27      | Cannot assess host specificity       |
| AMF                                     | 102            | 276     | 586     | 212     | 374     | 289     | 61      | Not specific                         |
| <i>Russula</i> sp.                      | 4              | 0       | 0       | 467     | 88      | 111     | 69      | Not specific                         |
| <i>Alnicola subconspersa</i>            | 1              | 154     | 0       | 0       | 151     | 307     | 1       | <i>Alnus</i> subgenus                |
| <i>Boletales</i>                        | 7              | 243     | 128     | 110     | 52      | 52      | 26      | Not specific                         |
| <i>Cortinarius</i> sp.                  | 20             | 1       | 160     | 80      | 195     | 97      | 70      | Not specific                         |
| <i>Sebacinaceae</i>                     | 19             | 8       | 63      | 307     | 19      | 22      | 16      | Not specific                         |
| <i>Tarzetta</i> sp.                     | 2              | 1       | 0       | 0       | 91      | 136     | 78      | Not specific                         |
| <i>Alnicola</i> sp.                     | 1              | 250     | 0       | 0       | 1       | 2       | 3       | Not specific                         |
| <i>Lactarius lepidotus</i>              | 1              | 0       | 0       | 180     | 0       | 0       | 0       | <i>Alnobetula</i> subgenus           |
| <i>Ceratobasidiaceae</i>                | 8              | 14      | 51      | 72      | 3       | 3       | 7       | Not specific                         |
| <i>Paxillus filamentosus</i>            | 1              | 0       | 80      | 0       | 1       | 0       | 0       | specific in experiment               |
| <i>Atheliaceae</i>                      | 3              | 8       | 4       | 32      | 3       | 3       | 4       | not specific                         |
| <i>Lactarius obscuratus</i>             | 1              | 30      | 0       | 0       | 0       | 0       | 0       | <i>Alnus</i> subgenus                |
| <i>Laccaria</i> sp.                     | 1              | 5       | 0       | 0       | 3       | 1       | 2       | Not specific                         |
| <i>Lactarius torminosus</i>             | 1              | 0       | 0       | 7       | 0       | 0       | 0       | Not specific                         |
| <i>Alnicola longicystis</i>             | 1              | 0       | 4       | 0       | 1       | 0       | 0       | <i>Alnus</i> subgenus                |
| <i>Amanita</i> sp.                      | 1              | 2       | 0       | 0       | 1       | 1       | 0       | Not specific                         |
| <i>Tricholoma</i> sp.                   | 1              | 0       | 0       | 4       | 0       | 0       | 0       | Not specific                         |
| <i>Lactarius</i> sp.                    | 1              | 0       | 4       | 0       | 0       | 0       | 0       | Not specific                         |
| <i>Alnicola citrinella/pallidifolia</i> | 1              | 0       | 0       | 2       | 0       | 0       | 0       | Cannot assess host specificity       |
| <i>Alnicola xanthophylla</i>            | 1              | 0       | 0       | 0       | 0       | 2       | 0       | <i>Alnus</i> subgenus                |
| <i>Lactarius brunneohepaticus</i>       | 1              | 0       | 0       | 2       | 0       | 0       | 0       | <i>Alnobetula</i> subgenus           |

**Supplementary data S4.** Outputs of Anova and Permanova tests on all fungal and ectomycorrhizal diversity and community structures.

| Species diversity           |                             | Soil                 |           |            |          |                 | Seedlings    |              |            |         |                 |              |              |              |
|-----------------------------|-----------------------------|----------------------|-----------|------------|----------|-----------------|--------------|--------------|------------|---------|-----------------|--------------|--------------|--------------|
|                             |                             | Df                   | Sum of Sq | Mean of Sq | F        | Pr(>F)          | Df           | Sum of Sq    | Mean of Sq | F       | Pr(>F)          |              |              |              |
| All fungi                   | trapping host               |                      |           |            |          |                 | 2            | 149491       | 74746      | 2.937   | 0.0679          |              |              |              |
|                             | sporulation                 | 1                    | 845867    | 845867     | 18.692   | <b>0.00099</b>  | 1            | 2052         | 2052       | 0.081   | 0.7784          |              |              |              |
|                             | indigenous host             | 2                    | 321809    | 160905     | 3.556    | 0.06128         | 2            | 818351       | 409176     | 16.075  | <b>1.62e-05</b> |              |              |              |
|                             | sporulation observed        |                      |           |            |          |                 | 3            | 34181        | 11394      | 0.351   | 0.789           |              |              |              |
|                             | IH*SP (ecoregion) residuals | 2                    | 459166    | 229583     | 5.073    | 0.02531         | 31           | 789063       | 25454      |         |                 |              |              |              |
| ECM fungi                   | trapping host               |                      |           |            |          |                 | 2            | 259541       | 129771     | 5.159   | <b>0.01164</b>  |              |              |              |
|                             | sporulation                 | 1                    | 612       | 612        | 0.328    | 0.5771          | 1            | 3181         | 3181       | 0.126   | 0.72453         |              |              |              |
|                             | indigenous host             | 2                    | 108926    | 54463      | 29.207   | <b>2.45e-05</b> | 2            | 514178       | 257089     | 10.220  | <b>0.00039</b>  |              |              |              |
|                             | sporulation observed        |                      |           |            |          |                 | 3            | 81475        | 27158      | 0.897   | 0.45315         |              |              |              |
|                             | IH*SP (ecoregion) residuals | 2                    | 20289     | 10145      | 5.440    | <b>0.0208</b>   | 2            | 241508       | 120754     | 4.800   | <b>0.01527</b>  |              |              |              |
| Community structure         |                             | Df                   | SumsOfSqs | MeanSqs    | F. model | R2              | Pr(>F)       | Df           | SumsOfSqs  | MeanSqs | F. model        | R2           | Pr(>F)       |              |
|                             | All fungi                   | trapping host        |           |            |          |                 |              | 2            | 1.4424     | 0.72120 | 2.5192          | 0.07203      | <b>0.001</b> |              |
|                             |                             | sporulation          | 1         | 0.9061     | 0.90609  | 3.8235          | 0.11970      | <b>0.001</b> | 1          | 1.3287  | 1.32869         | 4.6412       | 0.06635      | <b>0.001</b> |
|                             |                             | indigenous host      | 2         | 2.0702     | 1.03510  | 4.3679          | 0.27350      | <b>0.001</b> | 2          | 2.7458  | 1.37289         | 4.7956       | 0.13711      | <b>0.001</b> |
|                             |                             | sporulation observed |           |            |          |                 |              | 3            | 1.7634     | 0.58781 | 1.7755          | 0.08806      | <b>0.001</b> |              |
| IH*SP (ecoregion) residuals |                             | 2                    | 1.7494    | 0.87469    | 3.6910   | 0.23111         | <b>0.001</b> | 2            | 2.4521     | 1.22605 | 4.2826          | 0.12245      | <b>0.001</b> |              |
| ECM fungi                   | trapping host               |                      |           |            |          |                 | 2            | 1.3518       | 0.67592    | 2.6271  | 0.06755         | <b>0.001</b> |              |              |
|                             | sporulation                 | 1                    | 0.8636    | 0.86358    | 3.3566   | 0.11781         | <b>0.001</b> | 1            | 1.6266     | 1.62661 | 6.3222          | 0.08128      | <b>0.001</b> |              |
|                             | indigenous host             | 2                    | 1.9201    | 0.96005    | 3.7316   | 0.26195         | <b>0.001</b> | 2            | 3.0146     | 1.50728 | 5.8584          | 0.15064      | <b>0.001</b> |              |
|                             | sporulation observed        |                      |           |            |          |                 | 3            | 1.9227       | 0.64089    | 2.1284  | 0.09608         | <b>0.001</b> |              |              |
|                             | IH*SP (ecoregion) residuals | 2                    | 1.4591    | 0.72956    | 2.8357   | 0.19906         | <b>0.001</b> | 2            | 2.8584     | 1.42918 | 5.5549          | 0.14284      | <b>0.001</b> |              |
|                             | residuals                   | 12                   | 3.0873    | 0.25728    |          | 0.42118         |              | 31           | 7.9758     | 0.25728 |                 | 0.39857      |              |              |
